# Supplementary material for: MnO2-doped, polyaniline-grafted rice husk ash nanocomposites and their electrochemical capacitor applications
Source: Royal Society of Chemistry journal article supplement (doi:10.1039/c4ra04633a), 2014-01-01
Supplement: c4ra04633a1.pdf [file c4ra04633a1.pdf]

## **MnO<sub>2</sub> Doped Polyaniline Grafted Rice Husk Ash Nanocomposites and their Electrochemical Capacitor Applications**

P. Prabunathan,<sup>a</sup> K. Sethuraman <sup>a</sup>, and M. Alagar <sup>a\*</sup>

<sup>a</sup>*Polymer Composite Lab, Department of Chemical Engineering, Anna University, Chennai-600 025, India.*

*\*E-mail: [mkalagar@yahoo.com](mailto:mkalagar@yahoo.com) Fax: +91 4422359164; Tel: +91 4422359164.*

### **Supporting Information:**

The raw rice husk as contains following elements such as silica, carbon, potassium, calcium, Magnesium, Aluminium, Iron, Chlorine, Phosphorous, etc., Figure S1a. However, treating with burning, washing, calcinations and again leaching with acids are resulted in the purest form of silica as illustrated in the Figure S1b. Additionally, the composition of Polyaniline grafted rice husk ash (PANI/RHA) and MnO<sub>2</sub> doped polyaniline grafted rice husk ash (PANI/MnO<sub>2</sub>/RHA) are shown in the Figure S2a and S2b respectively. The respective composition of the elements of the raw rice husk, the treated rice husk ash (RHA), Polyaniline grafted rice husk ash (PANI/RHA) and MnO<sub>2</sub> doped polyaniline grafted rice husk ash (PANI/MnO<sub>2</sub>/RHA) are listed in the Table S3.

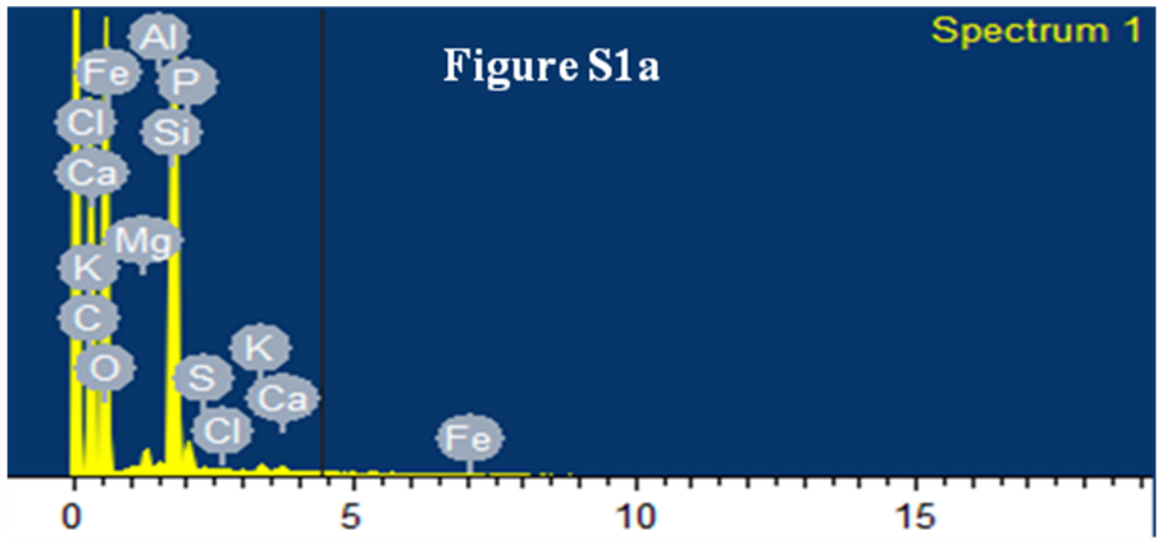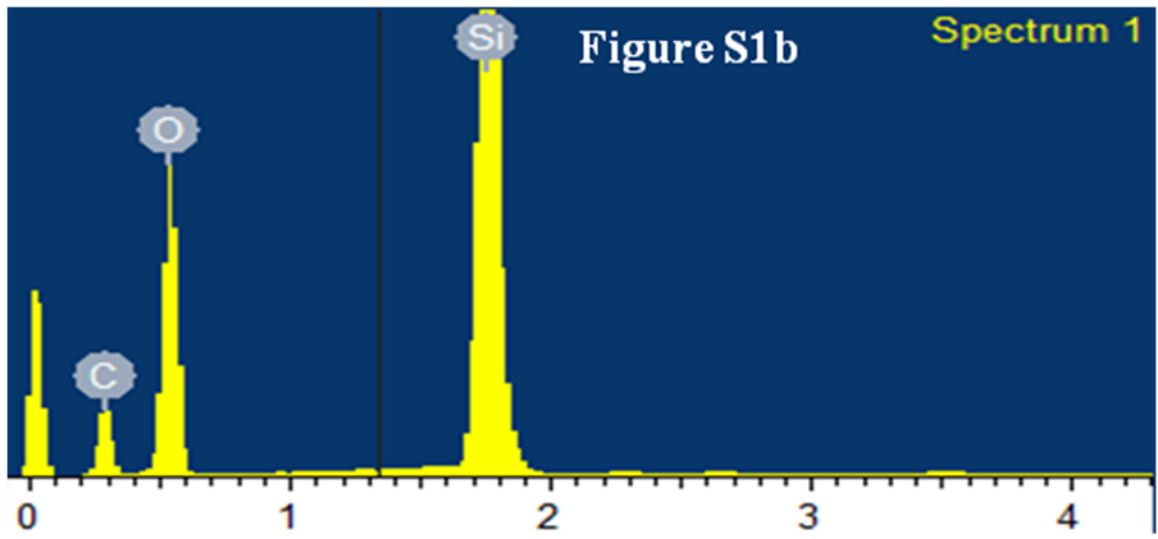

Figure S1a-b illustrates the EDAX profile of raw rice husk and rice husk ash (RHA)

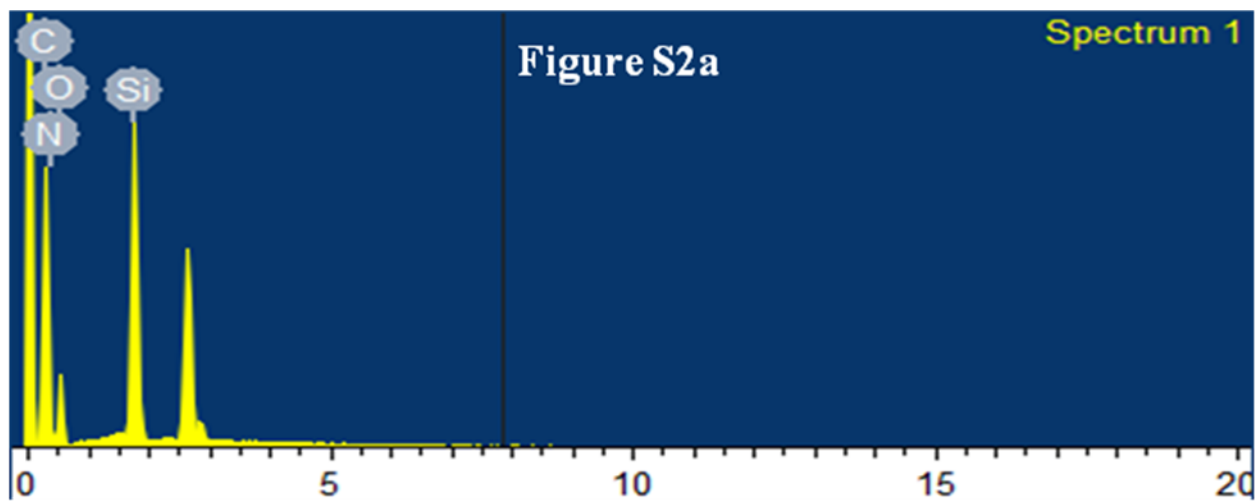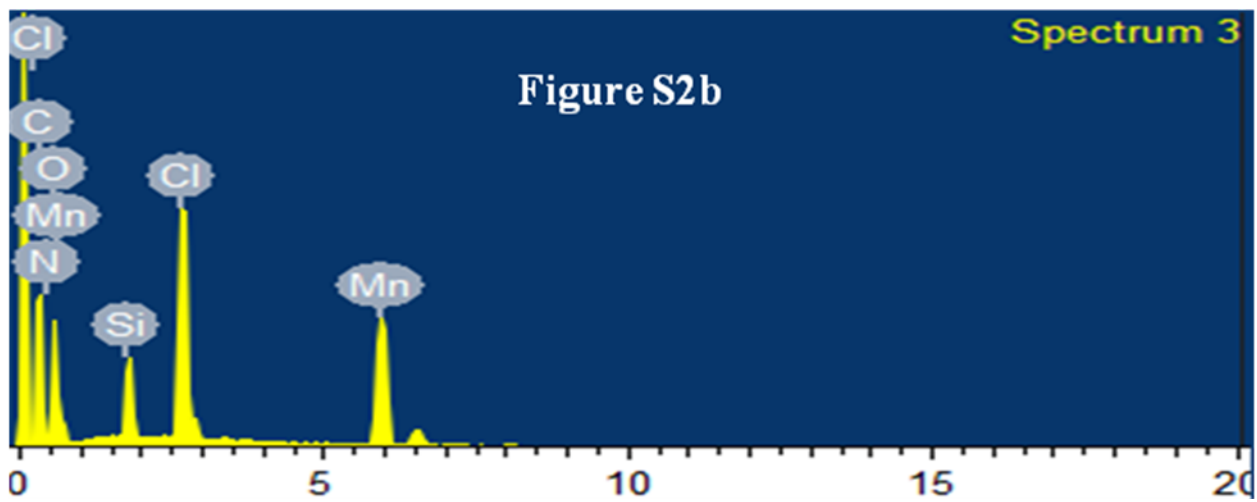

Figure S1a-b illustrates the EDAX profile of PANI/RHA and PANI/MnO<sub>2</sub>/RHA

**Table S3 Composition of elements present in the RHA, PANI/RHA and PANI/MnO<sub>2</sub>/RHA**

| <b>Raw Rice husk<br/>(Before treatment)</b> |        | <b>Rice husk ash (RHA)<br/>(After treatment)</b> |        | <b>PANI/RHA</b> |        | <b>PANI/MnO<sub>2</sub>/RHA</b> |        |
|---------------------------------------------|--------|--------------------------------------------------|--------|-----------------|--------|---------------------------------|--------|
| Elements                                    | Wt (%) | Elements                                         | Wt (%) | Elements        | Wt (%) | Elements                        | Wt (%) |
| C                                           | 46.85  | C                                                | 25.79  | C               | 57.27  | C                               | 36.99  |
| O                                           | 45.04  | O                                                | 50.72  | N               | 9.26   | O                               | 6.35   |
| Mg                                          | 0.35   | Si                                               | 23.49  | O               | 23.52  | Si                              | 30.36  |
| Al                                          | 0.05   |                                                  |        | Si              | 9.95   | N                               | 3.71   |
| Si                                          | 6.67   |                                                  |        |                 |        | Mn                              | 22.59  |
| P                                           | 0.58   |                                                  |        |                 |        |                                 |        |
| S                                           | 0.06   |                                                  |        |                 |        |                                 |        |
| Cl                                          | 0.04   |                                                  |        |                 |        |                                 |        |
| K                                           | 0.19   |                                                  |        |                 |        |                                 |        |
| Ca                                          | 0.11   |                                                  |        |                 |        |                                 |        |
| Fe                                          | 0.04   |                                                  |        |                 |        |                                 |        |

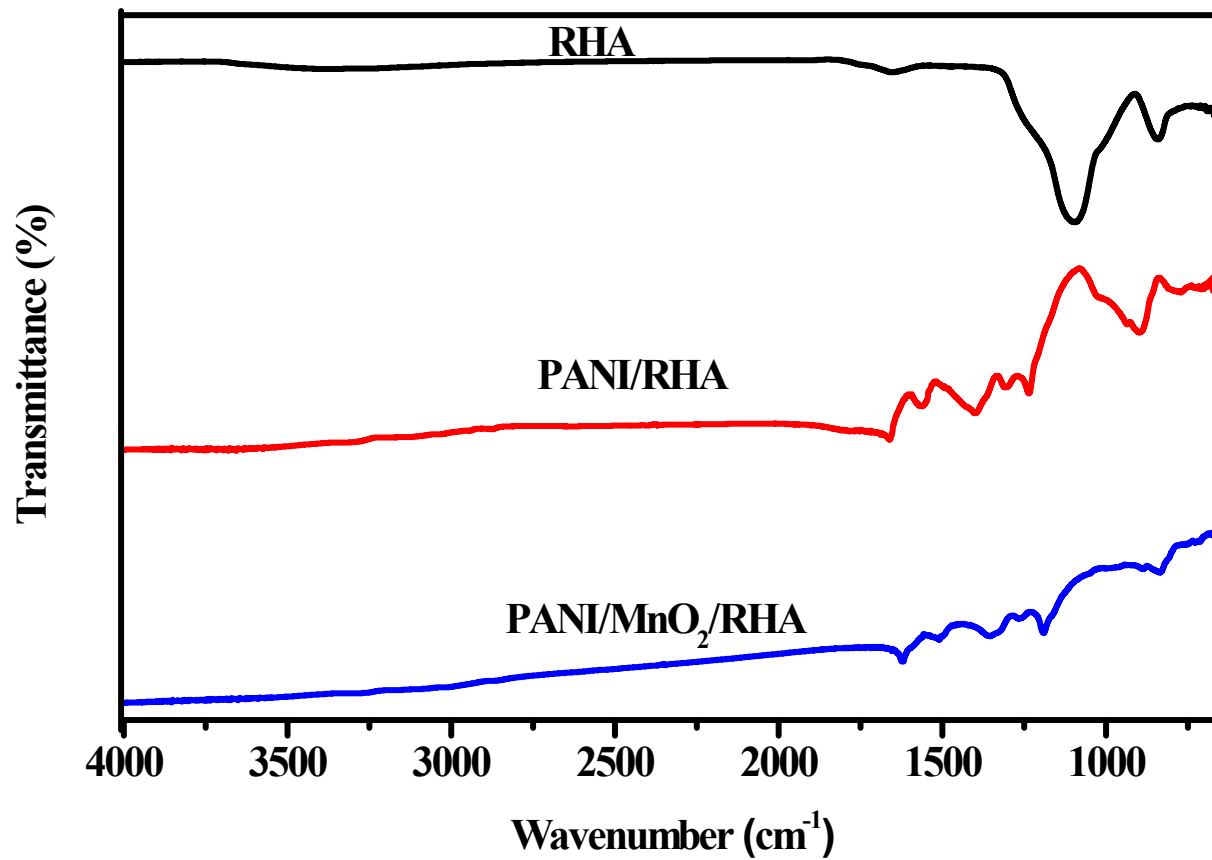

Figure S4, AT-IR spectra rice husk ash, (RHA), Polyaniline grafted rice husk ash (PANI/RHA) and MnO<sub>2</sub> doped polyaniline grafted rice husk ash (PANI/MnO<sub>2</sub>/RHA)

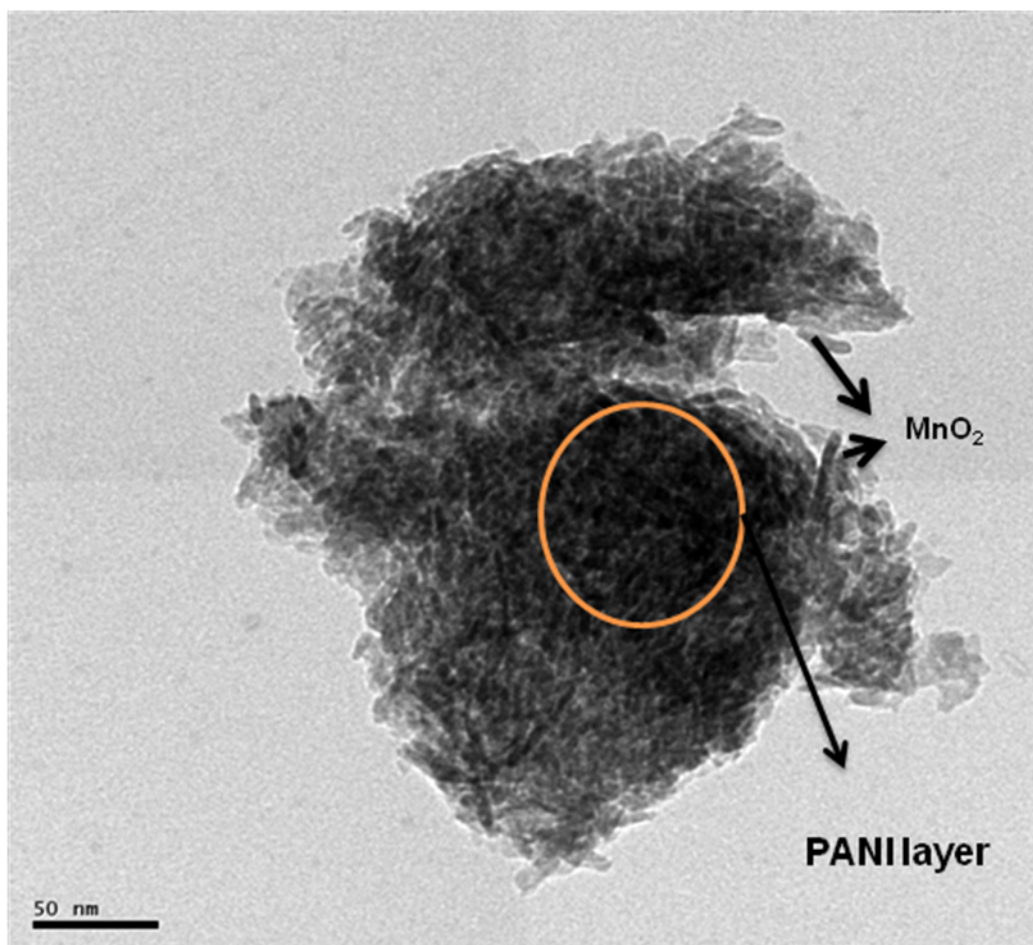

Figure S5, HR-TEM image of MnO<sub>2</sub> doped polyaniline grafted rice husk ash (PANI/MnO<sub>2</sub>/RHA)
